# Supplementary material for: Increased 15-PGDH expression leads to dysregulated resolution responses in stromal cells from patients with chronic tendinopathy
Source: PubMed Central journal article supplement (PMC5591234; doi:10.1038/s41598-017-11188-y), 2017-09-08
Supplement: 41598_2017_11188_MOESM1_ESM.pdf [file 41598_2017_11188_MOESM1_ESM.pdf]

## **Supplementary Information**

### ***Increased 15-PGDH expression leads to dysregulated resolution responses in stromal cells from patients with chronic tendinopathy***

Stephanie G Dakin\*<sup>1</sup>, Lucy Ly<sup>2</sup>, Romain A. Colas<sup>2</sup>, Udo Oppermann<sup>1,3</sup>, Kim Whewey<sup>1</sup>, Bridget Watkins<sup>1</sup>, Jesmond Dalli\*<sup>2+</sup>, Andrew J Carr<sup>1+</sup>.

#### **Supplementary Figures:**

**Figure S1.** Tendon stromal cell lipid mediator profiles.

**Figure S2.** 15-epi-LXA<sub>4</sub> up regulates SPM levels and down regulates prostaglandin production in healthy and diseased tendon stromal cells.

**Figure S3.** MaR1 down regulates prostaglandin production in healthy and diseased tendon stromal cells.

**Figure S4.** Schematic summarising dysregulated resolution responses in diseased tendon stromal cells and proposed therapeutic strategy to potentiate the bioactivity of proresolving mediators.

**Figure S5.** Isotype control staining of tissues and cells isolated from diseased human tendons.

#### **Supplementary Tables:**

**Supplement Table 1.** 15-epi-LXA<sub>4</sub> and MaR1 up regulate SPM and reduce inflammation-initiating eicosanoids in healthy tendon stromal cells.

**Supplement Table 2.** Regulation of lipid mediator profiles by 15-epi-LXA<sub>4</sub> and MaR1 in diseased tendon stromal cells.

**Figure S1**

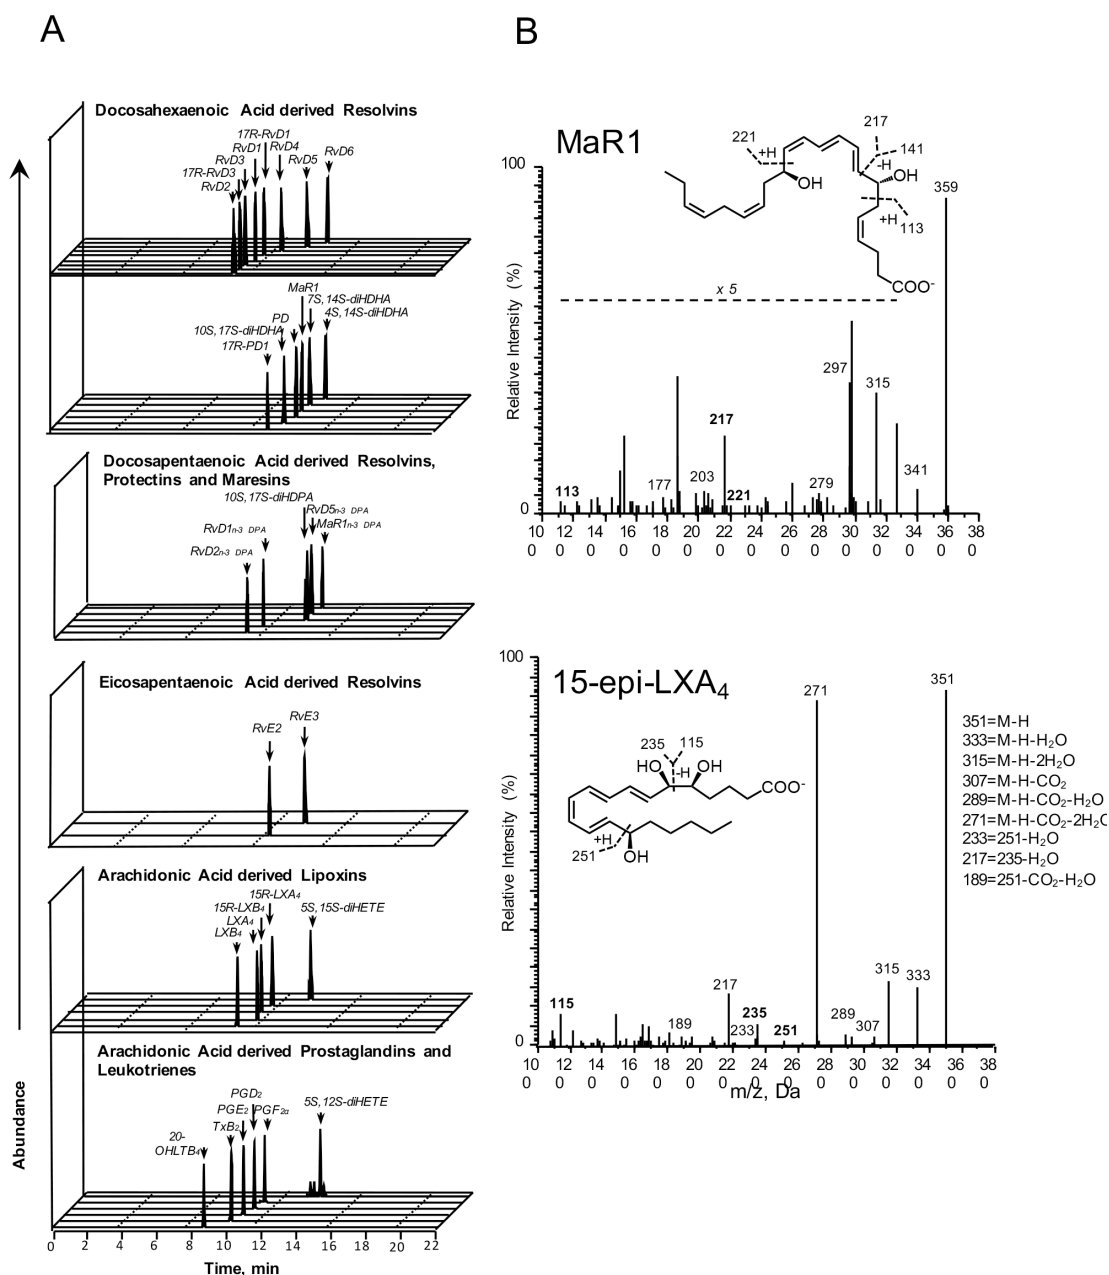

**Figure S1. Tendon stromal cell lipid mediator profiles.** Tendon stromal cells (60,000 cells per well) were derived from healthy hamstring (n=8 donors) or diseased supraspinatus tendons (n=8 donors). Cells were cultured in DMEM F12 phenol red free medium containing 1% heat inactivated human serum to 80% confluence and incubated with IL-1 $\beta$  for 24h. Media and cells were harvested and placed in ice-cold methanol containing deuterium labelled internal standards. LM were then extracted and profiled. **(A)** Representative MRM chromatograms for lipid mediators identified in healthy and disease cells. **(B)** MS-MS fragmentation spectra employed in the identification of MaR1 and 15-epi-LXA<sub>4</sub>. Results are representative of n=16 donors.

**Figure S2**

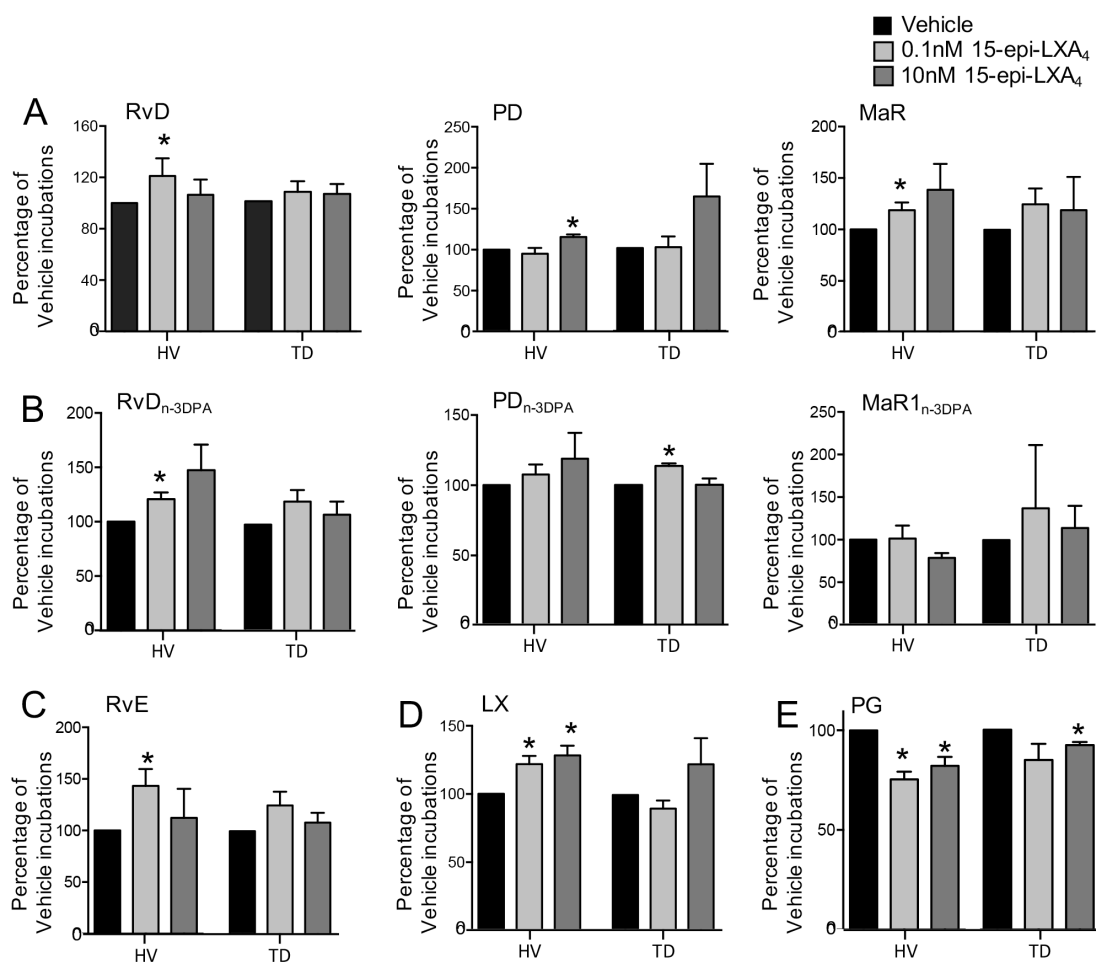

**Figure S2. 15-epi-LXA<sub>4</sub> up regulates SPM levels and down regulates prostaglandin production in healthy and diseased tendon stromal cells.** Tendon stromal cells were derived from healthy hamstring (H, n=7 donors) or diseased supraspinatus tendons (TD, n=6 donors). Cells were incubated with 15-epi-LXA<sub>4</sub> (0.1 or 10nM) or Vehicle for 24h at 37°C then with IL-1 $\beta$  (10ngml<sup>-1</sup>) for 24h. LM were identified and quantified using LM profiling (see methods for details). **(A)** DHA-derived RvD, PD, MaR **(B)** n-3 DPA-derived RvD<sub>n-3 DPA</sub>, PD<sub>n-3 DPA</sub>, MaR1<sub>n-3 DPA</sub>, **(C)** EPA-derived RvE **(D)** AA-derived (LX) and **(E)** PG in tendon stromal cells from healthy volunteers (HV) and patients with tendinopathy (TD). Results are mean  $\pm$  SEM n=7 HV and 6 TD per group. \*P < 0.05 vs respective vehicle group.

**Figure S3**

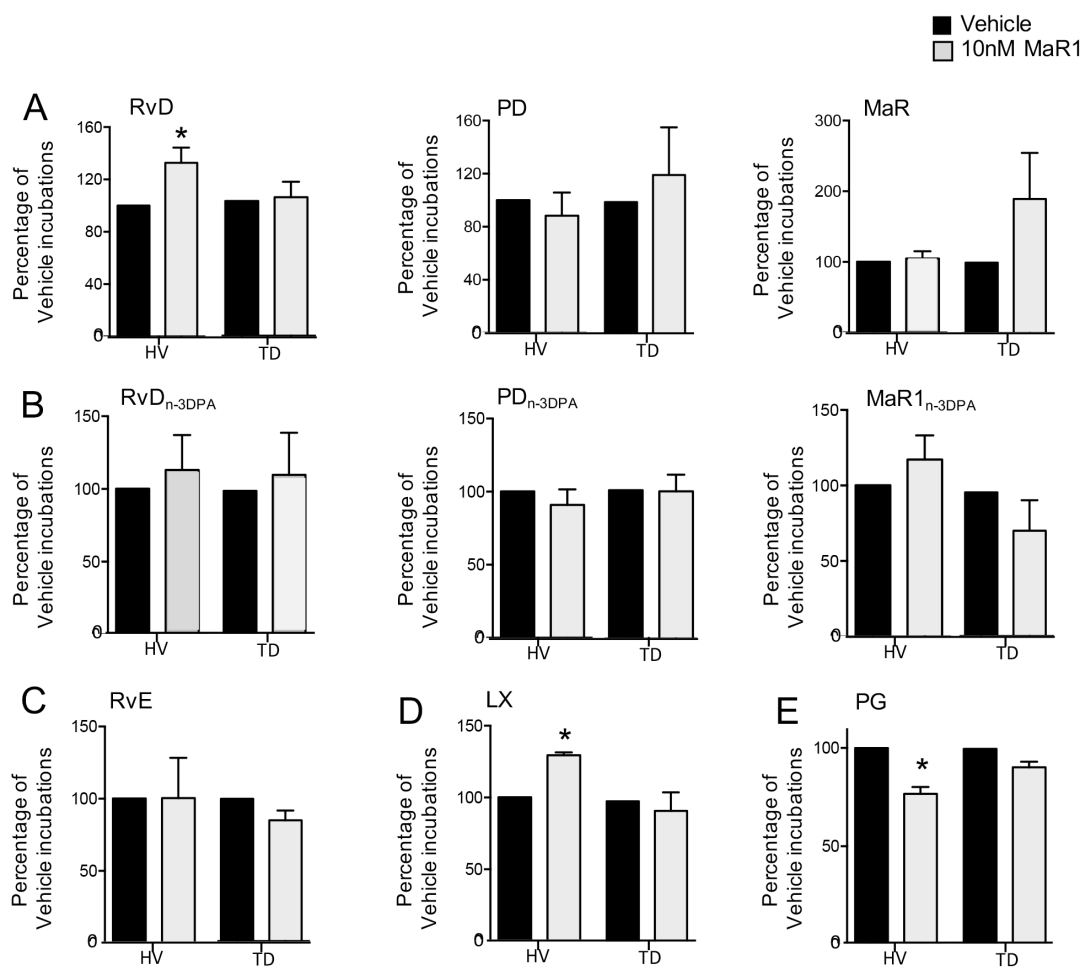

**Figure S3. MaR1 down regulates prostaglandin production in healthy and diseased tendon stromal cells.** Tendon stromal cells were derived from healthy hamstring (H, n=7 donors) or diseased supraspinatus tendons (TD, n=6 donors). Cells were incubated with MaR1 (10nM) or Vehicle for 24h at 37°C then with IL-1 $\beta$  (10ngml<sup>-1</sup>) for 24h. LM were identified and quantified using LM profiling (see methods for details). **(A)** DHA-derived RvD, PD, MaR **(B)** n-3 DPA-derived RvD<sub>n-3DPA</sub>, PD<sub>n-3DPA</sub>, MaR1<sub>n-3DPA</sub>, **(C)** EPA-derived RvE **(D)** AA-derived (LX) and **(E)** PG in tendon stromal cells from healthy volunteers (HV) and patients with tendinopathy (TD). Results are mean  $\pm$  SEM n=7 HV and 6 TD per group. \*P < 0.05 vs respective vehicle group.

**Figure S4**

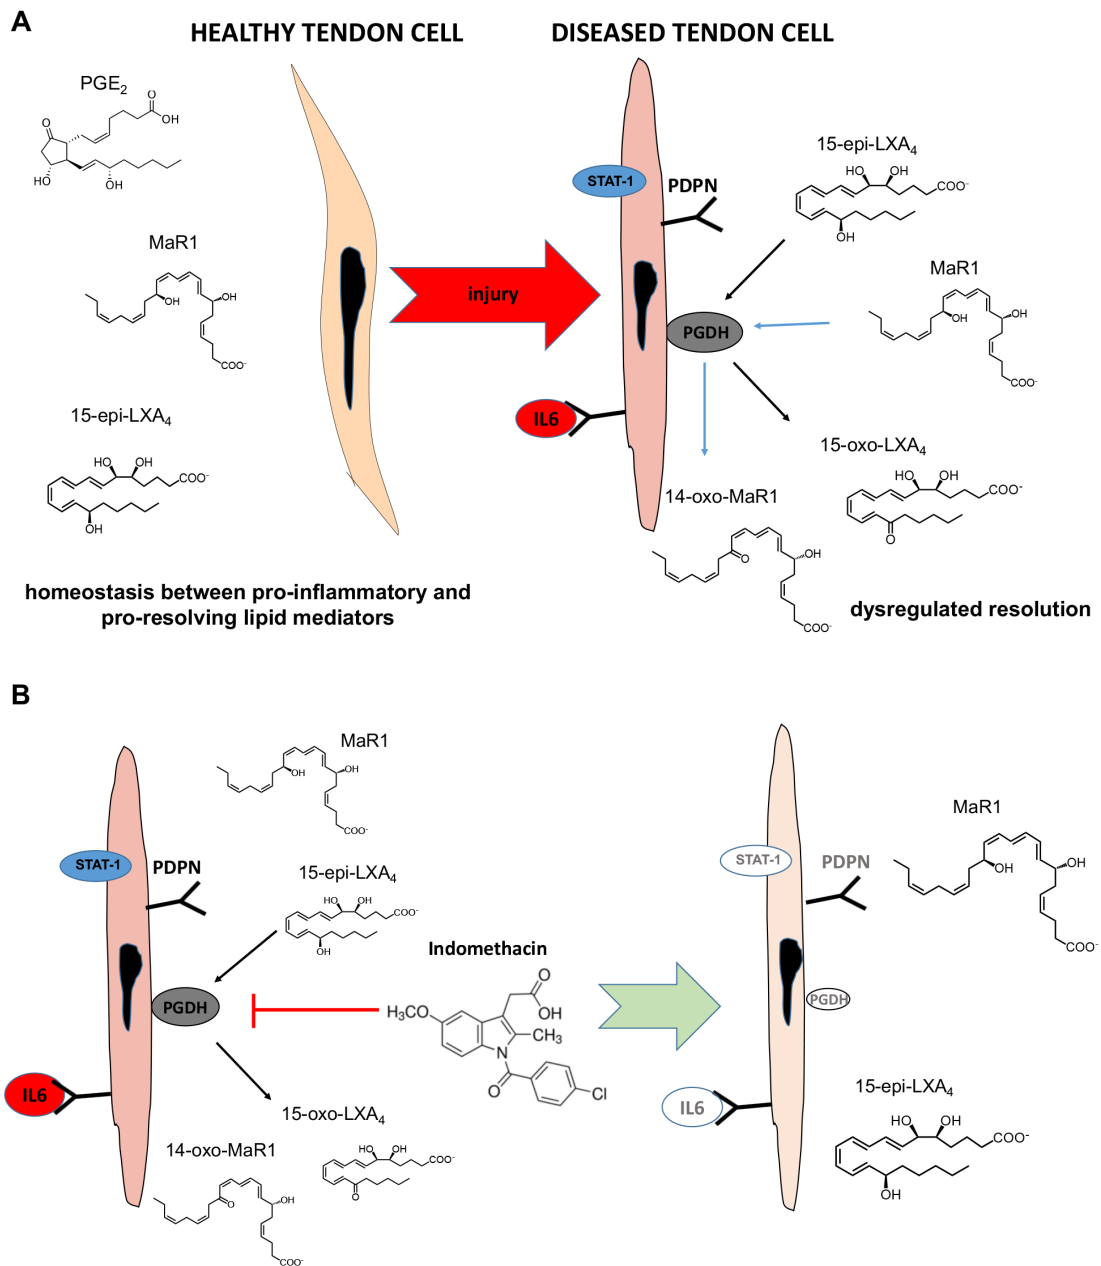

**Figure S4. Schematic summarising dysregulated resolution responses in diseased tendon stromal cells and proposed therapeutic strategy to potentiate the bioactivity of proresolving mediators. (A)** Stromal cells derived from patients with tendinopathy show rounded morphology, exhibit a pro-inflammatory profile and highly express STAT-1, PDPN, IL-6 and 15-PGDH compared to tendon cells from healthy donors. Diseased tendon stromal cells show an enhanced capacity to convert 15-epi-LXA<sub>4</sub> and MaR1 into respective oxo-metabolites with reduced bioactivity, mediated via 15-PGDH metabolism. **(B)** Co-treatment with indomethacin potentiates the bioactions of proresolving mediators including 15-epi-LXA<sub>4</sub> and MaR1 and modulates the pro-inflammatory phenotype of diseased tendon stromal cells.

**Figure S5**

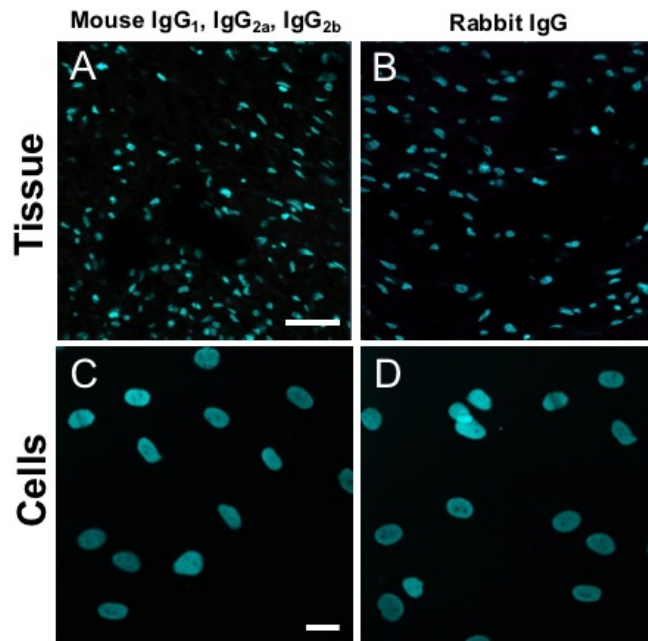

**Figure S5. Isotype control staining of tissues and cells isolated from diseased human tendons.** Representative confocal immunofluorescence images showing merged images of **(A, B)** diseased shoulder tendon tissue sections and **(C, D)** stromal cells isolated from diseased shoulder tendons stained with isotype control antibodies for mouse IgG<sub>1</sub>, IgG<sub>2a</sub>, IgG<sub>2b</sub> and rabbit IgG fractions. Cyan represents POPO-1 nuclear counterstain. Scale bars, 20 $\mu$ m.

**Supplement Table 1. 15-epi-LXA<sub>4</sub> and MaR1 up regulate SPM and reduce inflammation-initiating eicosanoids in healthy tendon stromal cells.**

| DHA bioactive metabolome            | Q1  | Q3  | Tendon stromal cells                   |                                                       |                                                      |                                   |
|-------------------------------------|-----|-----|----------------------------------------|-------------------------------------------------------|------------------------------------------------------|-----------------------------------|
|                                     |     |     | Lipid mediators levels (pg/incubation) |                                                       |                                                      |                                   |
|                                     |     |     | Healthy+ IL-1 $\beta$                  | Healthy+ IL-1 $\beta$ + 0.1nM 15-epi-LXA <sub>4</sub> | Healthy+ IL-1 $\beta$ + 10nM 15-epi-LXA <sub>4</sub> | Healthy+ IL-1 $\beta$ + 10nM MaR1 |
| RvD1                                | 375 | 141 | 9.8 $\pm$ 1.4                          | 12.2 $\pm$ 2.2 *                                      | 18.8 $\pm$ 13.5                                      | 12.4 $\pm$ 3.0 *                  |
| RvD2                                | 375 | 141 | 18.3 $\pm$ 5.4                         | 36.7 $\pm$ 12.9                                       | 16.8 $\pm$ 8.6                                       | 20.7 $\pm$ 10.0                   |
| RvD3                                | 375 | 147 | 9.3 $\pm$ 3.3                          | 13.9 $\pm$ 1.3                                        | 10.8 $\pm$ 5.7                                       | 10.9 $\pm$ 6.5                    |
| RvD4                                | 375 | 101 | 9.1 $\pm$ 2.5                          | 16.4 $\pm$ 3.5                                        | 16.3 $\pm$ 7.6                                       | 11.3 $\pm$ 5.5                    |
| RvD5                                | 359 | 199 | 60.0 $\pm$ 1.7                         | 63.5 $\pm$ 1.0 *                                      | 106.7 $\pm$ 61.8                                     | 69.6 $\pm$ 9.1                    |
| RvD6                                | 359 | 101 | 8.9 $\pm$ 1.5                          | 13.9 $\pm$ 1.6 *                                      | 40.0 $\pm$ 38.5                                      | 17.8 $\pm$ 4.4                    |
| 17R-RvD1                            | 375 | 141 | 3.6 $\pm$ 0.1                          | 4.5 $\pm$ 1.0                                         | 5.8 $\pm$ 3.0                                        | 2.7 $\pm$ 1.4                     |
| 17R-RvD3                            | 375 | 147 | 9.1 $\pm$ 1.9                          | 12.3 $\pm$ 4.3                                        | 9.5 $\pm$ 1.4                                        | 10.5 $\pm$ 4.4                    |
| PD1                                 | 359 | 153 | 37.2 $\pm$ 6.4                         | 40.4 $\pm$ 9.4                                        | 41.8 $\pm$ 7.5                                       | 37.3 $\pm$ 18.1                   |
| 17R-PD1                             | 359 | 153 | 1.3 $\pm$ 0.1                          | 1.1 $\pm$ 0.1                                         | 2.6 $\pm$ 2.1                                        | 1.2 $\pm$ 0.2                     |
| 10S,17S-diHDHA                      | 359 | 153 | 157.7 $\pm$ 5.9                        | 146.6 $\pm$ 19.4                                      | 185.7 $\pm$ 13.4 *                                   | 134.4 $\pm$ 33.5                  |
| MaR1                                | 359 | 221 | 9.4 $\pm$ 2.8                          | 10.3 $\pm$ 2.0 *                                      | 16.9 $\pm$ 4.5                                       | 525.5 $\pm$ 158.1 **              |
| MaR2                                | 359 | 191 | 2.1 $\pm$ 0.9                          | 4.1 $\pm$ 2.9                                         | 3.6 $\pm$ 1.7                                        | 2.5 $\pm$ 2.2                     |
| 7S,14S-diHDHA                       | 359 | 221 | 35.6 $\pm$ 2.8                         | 39.5 $\pm$ 3.2                                        | 42.0 $\pm$ 10.8                                      | 36.3 $\pm$ 13.8                   |
| 4S,14S-diHDHA                       | 359 | 101 | 3.4 $\pm$ 1.2                          | 6.7 $\pm$ 1.5 *                                       | 4.8 $\pm$ 2.8                                        | 4.2 $\pm$ 2.3                     |
| 14-oxo-MaR1                         | 357 | 248 | 2.9 $\pm$ 1.1                          | 0.0 $\pm$ 0.0                                         | 3.0 $\pm$ 1.7                                        | 19.5 $\pm$ 9.2 *                  |
| 22-OH-MaR1                          | 375 | 221 | 8.4 $\pm$ 2.5                          | 19.1 $\pm$ 3.9                                        | 11.3 $\pm$ 6.5                                       | 22.7 $\pm$ 9.5 *                  |
| <b>n-3 DPA bioactive metabolome</b> |     |     |                                        |                                                       |                                                      |                                   |
| RvD1 <sub>n-3 DPA</sub>             | 377 | 143 | 1.6 $\pm$ 0.5                          | 4.4 $\pm$ 2.4                                         | 10.7 $\pm$ 10.6                                      | 3.2 $\pm$ 2.1                     |
| RvD2 <sub>n-3 DPA</sub>             | 377 | 261 | 1.4 $\pm$ 1.0                          | 2.2 $\pm$ 0.5                                         | 1.9 $\pm$ 1.4                                        | 2.1 $\pm$ 1.0                     |
| RvD5 <sub>n-3 DPA</sub>             | 361 | 263 | 17.2 $\pm$ 3.2                         | 14.0 $\pm$ 0.6                                        | 46.7 $\pm$ 42.3                                      | 15.7 $\pm$ 2.6                    |
| PD1 <sub>n-3 DPA</sub>              | 361 | 183 | 97.1 $\pm$ 32.7                        | 113.6 $\pm$ 41.1                                      | 98.9 $\pm$ 67.3                                      | 90.6 $\pm$ 55.9                   |
| 10S,17S-diHDPA                      | 361 | 183 | 898.9 $\pm$ 241.5                      | 1407.8 $\pm$ 98.3                                     | 1009.1 $\pm$ 480.8                                   | 967.5 $\pm$ 449.9                 |
| MaR1 <sub>n-3 DPA</sub>             | 361 | 249 | 25.5 $\pm$ 6.8                         | 34.2 $\pm$ 8.4                                        | 21.3 $\pm$ 9.1                                       | 26.2 $\pm$ 11.7                   |
| <b>EPA bioactive metabolome</b>     |     |     |                                        |                                                       |                                                      |                                   |
| RvE1                                | 349 | 195 | 0.3 $\pm$ 0.1                          | 0.4 $\pm$ 0.5                                         | 0.2 $\pm$ 0.3                                        | 0.6 $\pm$ 0.4                     |
| RvE2                                | 333 | 199 | 38.7 $\pm$ 5.3                         | 47.5 $\pm$ 11.2                                       | 48.2 $\pm$ 25.5                                      | 36.7 $\pm$ 18.1                   |
| RvE3                                | 333 | 201 | 0.8 $\pm$ 0.5                          | 1.3 $\pm$ 0.8                                         | 1.3 $\pm$ 0.8                                        | 1.2 $\pm$ 0.8                     |
| <b>AA bioactive metabolome</b>      |     |     |                                        |                                                       |                                                      |                                   |
| LXA <sub>4</sub>                    | 351 | 217 | 3.2 $\pm$ 1.5                          | 333.2 $\pm$ 48.7 *                                    | 191.9 $\pm$ 80.8 *                                   | 268.8 $\pm$ 152.3 *               |
| LXB <sub>4</sub>                    | 351 | 221 | 74.3 $\pm$ 25.6                        | 278.0 $\pm$ 232.0                                     | 251.5 $\pm$ 130.2                                    | 119.5 $\pm$ 18.5                  |
| 5S,15S-diHETE                       | 335 | 235 | 1940.0 $\pm$ 187.3                     | 2491.0 $\pm$ 209.4                                    | 2367.6 $\pm$ 404.2 *                                 | 2250.3 $\pm$ 282.3 *              |
| 15epi-LXA <sub>4</sub>              | 351 | 217 | 186.2 $\pm$ 63.6                       | 298.4 $\pm$ 48.7                                      | 655.9 $\pm$ 64.1 **                                  | 266.5 $\pm$ 140.8                 |
| 15epi-LXB <sub>4</sub>              | 351 | 221 | 80.0 $\pm$ 22.5                        | 44.3 $\pm$ 11.8                                       | 79.4 $\pm$ 18.7                                      | 50.9 $\pm$ 3.2                    |
| 15-oxo-LXA <sub>4</sub>             | 349 | 233 | 10.7 $\pm$ 0.1                         | 11.5 $\pm$ 3.7                                        | 30.6 $\pm$ 4.7 **                                    | 12.1 $\pm$ 2.6                    |
| LTB <sub>4</sub>                    | 335 | 195 | 0.0 $\pm$ 0.0                          | 0.0 $\pm$ 0.0                                         | 0.0 $\pm$ 0.0                                        | 0.0 $\pm$ 0.0                     |
| 5S,12S-diHETE                       | 335 | 195 | 288.3 $\pm$ 74.0                       | 436.1 $\pm$ 45.6 *                                    | 338.3 $\pm$ 143.8                                    | 301.0 $\pm$ 136.1                 |
| PGD <sub>2</sub>                    | 351 | 189 | 2465.9 $\pm$ 1459.0                    | 322.4 $\pm$ 62.7 *                                    | 2086.3 $\pm$ 2506.7 *                                | 2012.6 $\pm$ 2049.3 *             |
| PGE <sub>2</sub>                    | 351 | 189 | 27091.1 $\pm$ 10813.8                  | 27436.1 $\pm$ 13292.2                                 | 21140.3 $\pm$ 14581.1 *                              | 21214.6 $\pm$ 15739.8 *           |
| PGF <sub>2<math>\alpha</math></sub> | 353 | 193 | 540.0 $\pm$ 81.6                       | 468.1 $\pm$ 170.3                                     | 485.7 $\pm$ 97.3                                     | 420.8 $\pm$ 97.6                  |
| TxB <sub>2</sub>                    | 369 | 169 | 20.6 $\pm$ 3.6                         | 15.4 $\pm$ 1.3                                        | 21.0 $\pm$ 6.7                                       | 15.9 $\pm$ 3.2                    |

Tendon stromal cells (60,000 cells per well) were derived from healthy hamstring tendons. Cells were incubated for 24h (37°C) with 15-epi-LXA<sub>4</sub> (0.1 or 10 nM) or MaR1 (10nM) then with IL-1 $\beta$  (37°C; 24 h). Incubations were quenched using ice-cold methanol containing deuterium labelled internal standards and lipid mediators (LM) were identified and quantified using LM-profiling (see methods for details). Q1, M-H (parent ion) and Q3, diagnostic ion in the MS-MS (daughter ion). Results are expressed as pg/incubation. Mean  $\pm$  SEM of n=7 per incubation. \*P < 0.05, \*\*P < 0.01 vs Healthy+IL1 $\beta$  incubations. The detection limit was ~ 0.1 pg. -, Below levels found in media alone.

**Supplement Table 2. Regulation of lipid mediator profiles by 15-epi-LXA<sub>4</sub> and MaR1 in diseased tendon stromal cells.**

| DHA bioactive metabolome            | Tendon stromal cells |     |                                        |                                                         |                                                        |                                     |
|-------------------------------------|----------------------|-----|----------------------------------------|---------------------------------------------------------|--------------------------------------------------------|-------------------------------------|
|                                     | Q1                   | Q3  | Lipid mediators levels (pg/incubation) |                                                         |                                                        |                                     |
|                                     |                      |     | Diseased + IL-1 $\beta$                | Diseased + IL-1 $\beta$ + 0.1nM 15-epi-LXA <sub>4</sub> | Diseased + IL-1 $\beta$ + 10nM 15-epi-LXA <sub>4</sub> | Diseased + IL-1 $\beta$ + 10nM MaR1 |
| RvD1                                | 375                  | 141 | 5.6 $\pm$ 4.4                          | 11.1 $\pm$ 2.8 *                                        | 6.2 $\pm$ 4.4                                          | 5.6 $\pm$ 4.7 *                     |
| RvD2                                | 375                  | 141 | 15.1 $\pm$ 11.4                        | 30.1 $\pm$ 9.7                                          | 14.7 $\pm$ 10.4                                        | 17.4 $\pm$ 13.1                     |
| RvD3                                | 375                  | 147 | 5.7 $\pm$ 4.6                          | 12.0 $\pm$ 2.6                                          | 5.3 $\pm$ 4.0                                          | 7.2 $\pm$ 5.4                       |
| RvD4                                | 375                  | 101 | 5.9 $\pm$ 3.8                          | 13.1 $\pm$ 2.0                                          | 7.6 $\pm$ 3.9                                          | 6.9 $\pm$ 5.0                       |
| RvD5                                | 359                  | 199 | 46.4 $\pm$ 14.2                        | 62.7 $\pm$ 12.2                                         | 48.2 $\pm$ 15.2                                        | 47.6 $\pm$ 12.3                     |
| RvD6                                | 359                  | 101 | 14.2 $\pm$ 4.8                         | 15.4 $\pm$ 5.7                                          | 15.8 $\pm$ 5.4                                         | 13.9 $\pm$ 2.1                      |
| 17R-RvD1                            | 375                  | 141 | 2.0 $\pm$ 1.1                          | 2.5 $\pm$ 1.4                                           | 3.7 $\pm$ 1.5                                          | 3.2 $\pm$ 1.8                       |
| 17R-RvD3                            | 375                  | 147 | 5.9 $\pm$ 3.0                          | 13.2 $\pm$ 5.4                                          | 7.2 $\pm$ 2.8                                          | 6.8 $\pm$ 3.6                       |
| PD1                                 | 359                  | 153 | 28.0 $\pm$ 22.4                        | 48.5 $\pm$ 25.1                                         | 28.4 $\pm$ 23.9                                        | 22.9 $\pm$ 20.5                     |
| 17R-PD1                             | 359                  | 153 | 0.6 $\pm$ 0.4                          | 1.5 $\pm$ 0.1                                           | 0.8 $\pm$ 0.6                                          | 0.7 $\pm$ 0.5                       |
| 10S,17S-diHDHA                      | 359                  | 153 | 117.1 $\pm$ 82.6                       | 189.7 $\pm$ 48.2                                        | 129.4 $\pm$ 50.5                                       | 112.9 $\pm$ 54.1                    |
| MaR1                                | 359                  | 221 | 21.0 $\pm$ 14.7                        | 15.6 $\pm$ 4.0                                          | 11.9 $\pm$ 4.3                                         | 346.0 $\pm$ 138.0                   |
| MaR2                                | 359                  | 191 | 8.2 $\pm$ 6.1                          | 14.5 $\pm$ 3.9                                          | 9.7 $\pm$ 6.8                                          | 10.0 $\pm$ 7.5                      |
| 7S,14S-diHDHA                       | 359                  | 221 | 26.4 $\pm$ 12.7                        | 28.1 $\pm$ 11.1                                         | 23.6 $\pm$ 9.2                                         | 25.1 $\pm$ 9.4                      |
| 4S,14S-diHDHA                       | 359                  | 101 | 3.6 $\pm$ 3.5                          | 9.5 $\pm$ 3.6                                           | 3.9 $\pm$ 3.6                                          | 3.2 $\pm$ 2.6                       |
| 14-oxo-MaR1                         | 357                  | 248 | 0.0 $\pm$ 0.0                          | 0.0 $\pm$ 0.0                                           | 1.1 $\pm$ 1.1                                          | 46.8 $\pm$ 11.2                     |
| 22-OH-MaR1                          | 375                  | 221 | 6.0 $\pm$ 2.8                          | 10.4 $\pm$ 4.5                                          | 7.2 $\pm$ 3.6                                          | 4.8 $\pm$ 2.7                       |
| <b>n-3 DPA bioactive metabolome</b> |                      |     |                                        |                                                         |                                                        |                                     |
| RvD1 <sub>n-3 DPA</sub>             | 377                  | 143 | 4.5 $\pm$ 1.8                          | 6.9 $\pm$ 2.3                                           | 6.2 $\pm$ 2.4                                          | 4.1 $\pm$ 0.8                       |
| RvD2 <sub>n-3 DPA</sub>             | 377                  | 261 | 0.9 $\pm$ 0.6                          | 1.9 $\pm$ 0.5                                           | 1.1 $\pm$ 1.1                                          | 1.0 $\pm$ 0.6                       |
| RvD5 <sub>n-3 DPA</sub>             | 361                  | 263 | 15.8 $\pm$ 6.8                         | 16.1 $\pm$ 3.2                                          | 15.0 $\pm$ 5.5                                         | 13.2 $\pm$ 2.2                      |
| PD1 <sub>n-3 DPA</sub>              | 361                  | 183 | 98.6 $\pm$ 108.0                       | 157.6 $\pm$ 97.8                                        | 93.7 $\pm$ 91.5                                        | 76.9 $\pm$ 86.6                     |
| 10S,17S-diHDPA                      | 361                  | 183 | 657.7 $\pm$ 573.4                      | 1534.8 $\pm$ 483.6                                      | 683.3 $\pm$ 591.3                                      | 535.9 $\pm$ 420.9                   |
| MaR1 <sub>n-3 DPA</sub>             | 361                  | 249 | 12.7 $\pm$ 8.5                         | 25.3 $\pm$ 13.0                                         | 13.1 $\pm$ 9.3                                         | 12.1 $\pm$ 8.8                      |
| <b>EPA bioactive metabolome</b>     |                      |     |                                        |                                                         |                                                        |                                     |
| RvE1                                | 349                  | 195 | 0.1 $\pm$ 0.2                          | 0.1 $\pm$ 0.1                                           | 0.1 $\pm$ 0.1                                          | 0.1 $\pm$ 0.1                       |
| RvE2                                | 333                  | 199 | 55.7 $\pm$ 13.6                        | 74.0 $\pm$ 5.4                                          | 59.7 $\pm$ 18.4                                        | 45.3 $\pm$ 8.9                      |
| RvE3                                | 333                  | 201 | 0.7 $\pm$ 0.6                          | 2.6 $\pm$ 0.1                                           | 2.1 $\pm$ 1.7                                          | 0.9 $\pm$ 0.6                       |
| <b>AA bioactive metabolome</b>      |                      |     |                                        |                                                         |                                                        |                                     |
| LXA <sub>4</sub>                    | 351                  | 217 | 3.4 $\pm$ 3.5                          | 37.2 $\pm$ 19.3                                         | 142.5 $\pm$ 106.2                                      | 241.0 $\pm$ 200.0                   |
| LXB <sub>4</sub>                    | 351                  | 221 | 58.0 $\pm$ 57.3                        | 109.0 $\pm$ 40.4                                        | 117.0 $\pm$ 96.8                                       | 90.0 $\pm$ 59.1                     |
| 5S,15S-diHETE                       | 335                  | 235 | 1752.2 $\pm$ 1034.1                    | 3004.4 $\pm$ 866.9                                      | 1815.1 $\pm$ 916.1                                     | 1487.7 $\pm$ 821.3                  |
| 15epi-LXA <sub>4</sub>              | 351                  | 217 | 287.6 $\pm$ 165.1                      | 427.1 $\pm$ 92.1                                        | 473.4 $\pm$ 124.1                                      | 256.0 $\pm$ 200.4                   |
| 15epi-LXB <sub>4</sub>              | 351                  | 221 | 55.5 $\pm$ 22.6                        | 53.0 $\pm$ 4.7                                          | 88.2 $\pm$ 42.2                                        | 73.9 $\pm$ 10.4                     |
| 15-oxo-LXA <sub>4</sub>             | 349                  | 233 | 2.5 $\pm$ 2.7                          | 9.3 $\pm$ 0.2                                           | 55.4 $\pm$ 11.2                                        | 5.2 $\pm$ 4.9                       |
| LTB <sub>4</sub>                    | 335                  | 195 | 0.0 $\pm$ 0.0                          | 0.0 $\pm$ 0.0                                           | 0.0 $\pm$ 0.0                                          | 0.0 $\pm$ 0.0                       |
| 5S,12S-diHETE                       | 335                  | 195 | 232.1 $\pm$ 201.8                      | 512.3 $\pm$ 182.1                                       | 242.4 $\pm$ 197.6                                      | 214.3 $\pm$ 162.6                   |
| PGD <sub>2</sub>                    | 351                  | 189 | 1161.0 $\pm$ 628.4                     | 231.5 $\pm$ 92.9                                        | 176.9 $\pm$ 72.9                                       | 145.0 $\pm$ 78.1                    |
| PGE <sub>2</sub>                    | 351                  | 189 | 23342.7 $\pm$ 18984.9                  | 39971.2 $\pm$ 10694.7                                   | 22697.5 $\pm$ 17442.7                                  | 22088.1 $\pm$ 17520.2               |
| PGF <sub>2<math>\alpha</math></sub> | 353                  | 193 | 300.7 $\pm$ 206.0                      | 416.7 $\pm$ 234.1                                       | 269.0 $\pm$ 185.5                                      | 293.2 $\pm$ 224.6                   |
| TxB <sub>2</sub>                    | 369                  | 169 | 10.1 $\pm$ 4.1                         | 14.6 $\pm$ 1.7                                          | 8.5 $\pm$ 2.4                                          | 9.1 $\pm$ 2.3                       |

Tendon stromal cells (60,000 cells per well) were derived from diseased supraspinatus tendons. Cells were incubated for 24h (37°C) with 15-epi-LXA<sub>4</sub> (0.1 or 10 nM) or MaR1 (10nM) then with IL-1 $\beta$  (37°C; 24 h). Incubations were quenched using ice-cold methanol containing deuterium labelled internal standards and lipid mediators (LM) were identified and quantified using LM-metabololipidomics (see methods for details). Q1, M-H (parent ion) and Q3, diagnostic ion in the MS-MS (daughter ion). Results are expressed as pg/incubation. Mean  $\pm$  SEM of n=6 per incubation. \*P < 0.05, \*\*P < 0.01 vs Disease+IL1 $\beta$  incubations. The detection limit was ~ 0.1 pg. -, Below levels found in media alone.
